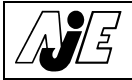

## Risk Indicators for Falls in Institutionalized Frail Elderly

M. Kron<sup>1</sup>, S. Loy<sup>1</sup>, E. Sturm<sup>2</sup>, Th. Nikolaus<sup>2</sup>, and C. Becker<sup>2</sup>

<sup>1</sup> Department of Biometry and Medical Documentation, Universität Ulm, Ulm, Germany.

<sup>2</sup> Bethesda Geriatriische Klinik, Academic Centre at the University of Ulm, Ulm, Germany.

Received for publication October 18, 2002; accepted for publication April 17, 2003.

The aim of this study was to identify individual predisposing risk indicators for falls in a sample of institutionalized frail elderly in southern Germany. The design was a prospective observational study with a 1-year follow-up (October 1998–September 1999). The study population included 472 long-term-care residents whose mean age was 84 years; 77% were female. Risk indicators for accidental falls were analyzed by using logistic regression. Residents were found to have an incidence density rate of falls of 2,558 per 1,000 resident-years. Multiple logistic regression analysis revealed short-term memory loss, transfer assistance, urinary incontinence, positive fall history, and use of trunk restraints as predictors of falls. In a further logistic regression analysis, depressive symptoms, transfer assistance, urinary incontinence, and positive fall history were associated with frequent falls. Using these risk indicators as a screening procedure to identify fallers would be easy to administer and could be accomplished by nursing staff. Study results encourage specifically addressing urinary incontinence, cognitive impairment, use of restraints, depression, and transfer difficulties as modifiable predisposing risk factors for falls. Fall history represents an important nonmodifiable marker to identify residents at high risk.

accidental falls; aged; institutionalization; long-term care; risk factors

Abbreviation: CI, confidence interval.

Falls remain a major health problem despite several successful intervention trials to reduce the number of falls (1). The incidence of falls and related severe injuries is particularly high in institutionalized elderly. Identification of risk indicators for falls has been the aim of several studies and reviews of community dwellers (2–6) and nursing home residents (7–12). The risk indicators examined include demographic factors, neuromuscular function, disease and fall history, psychological impairments, types and numbers of medications, the physical environment, functional disabilities, and social handicaps. The Resident Assessment Instrument is the mandated care assessment tool in US nursing homes. This instrument mentions fall history, mechanical restraints, dizziness, wandering, and prescription of antidepressants or anxiolytic medication as the most important risk factors for falls (13). However, this topic has not been studied adequately and is based on expert opinion. An interesting approach including fall history, impression regarding general care, and examina-

tion of a dual task was used by a Swedish group looking at elderly living in residential care settings, but it seems to be difficult to apply in nursing homes (14).

Interventions to eliminate the aforementioned risk indicators have been only partly successful in the long-term-care setting. Only very few intervention studies have reported a favorable outcome (15–17). The successful studies have used multifaceted approaches including exercise to improve strength and balance, environmental adaptations, staff training, resident counseling, appropriate use of psychoactive drugs, and maintenance of walking aids and wheelchairs. Unfortunately, the magnitude of the effect of each component of the multifaceted intervention is unknown because of the design of these studies.

The aim of the present study was to develop a simple and stratified fall risk screening tool. This tool should ensure that time, effort, and cost are as low as possible. The procedures should be easy to perform, be adminis-

Reprint requests to Dr. Clemens Becker, Bethesda Geriatriische Klinik, Academic Centre at the University of Ulm, Zollernring 26-28, D-89073 Ulm, Germany (e-mail: clemens.becker@medizin.uni-ulm.de).

**TABLE 1. Crude odds ratios for fallers and frequent fallers in long-term care (n = 472), Ulm, Germany, October 1998–September 1999**

| Part*                             | Variable                             | No fall | 1–2 falls | >2 falls | No fall vs. ≥1 fall |          | ≤2 falls vs. >2 falls |          |
|-----------------------------------|--------------------------------------|---------|-----------|----------|---------------------|----------|-----------------------|----------|
|                                   |                                      |         |           |          | OR†                 | 95% CI†  | OR                    | 95% CI   |
| <i>Cognitive patterns</i>         |                                      |         |           |          |                     |          |                       |          |
| Memory                            |                                      |         |           |          |                     |          |                       |          |
| B2                                | Short-term memory‡                   |         |           |          |                     |          |                       |          |
|                                   | Intact (reference)                   | 114     | 47        | 40       |                     |          |                       |          |
|                                   | Problem                              | 86      | 77        | 67       | 2.2§                | 1.5, 3.2 | 1.7§                  | 1.1, 2.6 |
|                                   | Not assessable                       | 24      | 10        | 7        | 0.9                 | 0.5, 1.8 | 0.8                   | 0.3, 2.0 |
| Memory/recall ability             |                                      |         |           |          |                     |          |                       |          |
| B3                                | Current season                       |         |           |          |                     |          |                       |          |
|                                   | Yes (reference)                      | 145     | 70        | 61       |                     |          |                       |          |
|                                   | No                                   | 79      | 64        | 53       | 1.6§                | 1.1, 2.4 | 1.3                   | 0.9, 2.0 |
| B3                                | Location of own room                 |         |           |          |                     |          |                       |          |
|                                   | Yes (reference)                      | 152     | 79        | 68       |                     |          |                       |          |
|                                   | No                                   | 72      | 55        | 46       | 1.5                 | 1.0, 2.1 | 1.2                   | 0.8, 1.9 |
| <i>Communication</i>              |                                      |         |           |          |                     |          |                       |          |
| C4                                | Making self understood               |         |           |          |                     |          |                       |          |
|                                   | Understood (reference)               | 154     | 73        | 74       |                     |          |                       |          |
|                                   | Usually or sometimes or never        | 70      | 61        | 40       | 1.5                 | 1.0, 2.2 | 0.9                   | 0.6, 1.5 |
| <i>Vision patterns</i>            |                                      |         |           |          |                     |          |                       |          |
| D1                                | Vision‡                              |         |           |          |                     |          |                       |          |
|                                   | Adequate (reference)                 | 148     | 73        | 63       |                     |          |                       |          |
|                                   | Impaired                             | 41      | 40        | 37       | 2.0§                | 1.3, 3.1 | 1.6                   | 0.9, 2.6 |
|                                   | Highly or severely impaired          | 35      | 21        | 14       | 1.1                 | 0.6, 1.8 | 0.9                   | 0.5, 1.7 |
| <i>Mood and behavior patterns</i> |                                      |         |           |          |                     |          |                       |          |
| E1sum                             | Depression any symptom‡              |         |           |          |                     |          |                       |          |
|                                   | Not exhibited (reference)            | 128     | 72        | 47       |                     |          |                       |          |
|                                   | At least one sign exhibited          | 96      | 62        | 67       | 1.4                 | 1.0, 2.1 | 1.8§                  | 1.2, 2.8 |
| E4sum                             | Behavior any symptom‡                |         |           |          |                     |          |                       |          |
|                                   | Not exhibited (reference)            | 185     | 98        | 78       |                     |          |                       |          |
|                                   | At least one sign exhibited          | 39      | 36        | 36       | 1.9§                | 1.2, 3.0 | 1.7§                  | 1.1, 2.8 |
| Verbal expression of distress     |                                      |         |           |          |                     |          |                       |          |
| E1                                | Negative statements                  |         |           |          |                     |          |                       |          |
|                                   | Not exhibited (reference)            | 198     | 121       | 98       |                     |          |                       |          |
|                                   | Exhibited ≥1 day/week                | 26      | 13        | 16       | 1.0                 | 0.6, 1.7 | 1.3                   | 0.7, 2.5 |
| E1                                | Repetitive questions                 |         |           |          |                     |          |                       |          |
|                                   | Not exhibited (reference)            | 203     | 120       | 102      |                     |          |                       |          |
|                                   | Exhibited ≥1 day/week                | 21      | 14        | 12       | 1.1                 | 0.6, 2.1 | 1.1                   | 0.5, 2.2 |
| E1                                | Repetitive verbalization             |         |           |          |                     |          |                       |          |
|                                   | Not exhibited (reference)            | 213     | 126       | 100      |                     |          |                       |          |
|                                   | Exhibited ≥1 day/week                | 11      | 8         | 14       | 1.9                 | 0.9, 4.0 | 2.5§                  | 1.2, 5.2 |
| E1                                | Persistent anger with self or others |         |           |          |                     |          |                       |          |
|                                   | Not exhibited (reference)            | 203     | 126       | 104      |                     |          |                       |          |
|                                   | Exhibited ≥1 day/week                | 21      | 8         | 10       | 0.8                 | 0.4, 1.5 | 1.1                   | 0.5, 2.3 |
| E1                                | Self-deprecation                     |         |           |          |                     |          |                       |          |
|                                   | Not exhibited (reference)            | 203     | 124       | 99       |                     |          |                       |          |
|                                   | Exhibited ≥1 day/week                | 21      | 10        | 15       | 1.1                 | 0.6, 2.0 | 1.6                   | 0.8, 3.1 |

Table continues

TABLE 1. Continued

| Part* | Variable                                                        | No fall | 1–2 falls | >2 falls | No fall vs. ≥1 fall |          | ≤2 falls vs. >2 falls |          |  |
|-------|-----------------------------------------------------------------|---------|-----------|----------|---------------------|----------|-----------------------|----------|--|
|       |                                                                 |         |           |          | OR                  | 95% CI   | OR                    | 95% CI   |  |
| E1    | Expressions of what appear to be unrealistic fears              |         |           |          |                     |          |                       |          |  |
|       | Not exhibited (reference)                                       | 199     | 121       | 97       |                     |          |                       |          |  |
|       | Exhibited ≥1 day/week                                           | 25      | 13        | 17       | 1.1                 | 0.6, 1.9 | 1.5                   | 0.8, 2.7 |  |
| E1    | Recurrent statements that something terrible is about to happen |         |           |          |                     |          |                       |          |  |
|       | Not exhibited (reference)                                       | 217     | 128       | 110      |                     |          |                       |          |  |
|       | Exhibited ≥1 day/week                                           | 7       | 6         | 4        | 1.3                 | 0.5, 3.5 | 1.0                   | 0.3, 3.0 |  |
| E1    | Repetitive health complaints                                    |         |           |          |                     |          |                       |          |  |
|       | Not exhibited (reference)                                       | 203     | 127       | 102      |                     |          |                       |          |  |
|       | Exhibited ≥1 day/week                                           | 21      | 7         | 12       | 0.8                 | 0.4, 1.5 | 1.4                   | 0.7, 2.8 |  |
| E1    | Repetitive anxious complaints or concerns, nonhealth            |         |           |          |                     |          |                       |          |  |
|       | Not exhibited (reference)                                       | 201     | 119       | 101      |                     |          |                       |          |  |
|       | Exhibited ≥1 day/week                                           | 23      | 15        | 13       | 1.1                 | 0.6, 2.0 | 1.1                   | 0.6, 2.1 |  |
|       | Sad, apathetic, anxious appearance                              |         |           |          |                     |          |                       |          |  |
| E1    | Sad, pained, worried facial expressions                         |         |           |          |                     |          |                       |          |  |
|       | Not exhibited (reference)                                       | 175     | 108       | 84       |                     |          |                       |          |  |
|       | Exhibited ≥1 day/week                                           | 49      | 26        | 30       | 1.0                 | 0.7, 1.6 | 1.3                   | 0.8, 2.2 |  |
| E1    | Crying, tearfulness                                             |         |           |          |                     |          |                       |          |  |
|       | Not exhibited (reference)                                       | 188     | 116       | 82       |                     |          |                       |          |  |
|       | Exhibited ≥1 day/week                                           | 36      | 18        | 32       | 1.3                 | 0.8, 2.1 | 2.2§                  | 1.3, 3.6 |  |
| E1    | Repetitive physical movements                                   |         |           |          |                     |          |                       |          |  |
|       | Not exhibited (reference)                                       | 204     | 111       | 93       |                     |          |                       |          |  |
|       | Exhibited ≥1 day/week                                           | 20      | 23        | 21       | 2.2§                | 1.3, 3.9 | 1.7                   | 0.9, 2.3 |  |
|       | Behavioral symptoms                                             |         |           |          |                     |          |                       |          |  |
| E4    | Wandering                                                       |         |           |          |                     |          |                       |          |  |
|       | Not exhibited (reference)                                       | 211     | 121       | 97       |                     |          |                       |          |  |
|       | Exhibited at least 1 time                                       | 13      | 13        | 17       | 2.2§                | 1.1, 4.4 | 2.2§                  | 1.2, 4.3 |  |
| E4    | Verbally abusive                                                |         |           |          |                     |          |                       |          |  |
|       | Not exhibited (reference)                                       | 200     | 122       | 97       |                     |          |                       |          |  |
|       | Exhibited at least 1 time                                       | 24      | 12        | 17       | 1.1                 | 0.6, 2.0 | 1.6                   | 0.9, 3.0 |  |
| E4    | Physically abusive                                              |         |           |          |                     |          |                       |          |  |
|       | Not exhibited (reference)                                       | 212     | 126       | 104      |                     |          |                       |          |  |
|       | Exhibited at least 1 time                                       | 12      | 8         | 10       | 1.4                 | 0.7, 2.9 | 1.6                   | 0.7, 3.6 |  |
| E4    | Socially inappropriate or disruptive behavior                   |         |           |          |                     |          |                       |          |  |
|       | Not exhibited (reference)                                       | 218     | 125       | 108      |                     |          |                       |          |  |
|       | Exhibited at least 1 time                                       | 6       | 9         | 6        | 2.3                 | 0.9, 6.1 | 1.3                   | 0.5, 3.4 |  |
| E4    | Resists care                                                    |         |           |          |                     |          |                       |          |  |
|       | Not exhibited (reference)                                       | 208     | 119       | 100      |                     |          |                       |          |  |
|       | Exhibited at least 1 time                                       | 16      | 15        | 14       | 1.7                 | 0.9, 3.2 | 1.5                   | 0.8, 2.9 |  |
|       | <i>Physical functioning and structural problems</i>             |         |           |          |                     |          |                       |          |  |
|       | ADL† performance                                                |         |           |          |                     |          |                       |          |  |
| G1    | Transfer‡                                                       |         |           |          |                     |          |                       |          |  |
|       | Independent (reference)                                         | 120     | 61        | 55       |                     |          |                       |          |  |
|       | Supervision or assistance                                       | 38      | 44        | 43       | 2.4§                | 1.5, 3.7 | 1.7§                  | 1.1, 2.8 |  |
|       | Total dependence or did not occur                               | 66      | 29        | 16       | 0.7                 | 0.4, 1.1 | 0.6                   | 0.3, 1.0 |  |

Table continues

TABLE 1. Continued

| Part* | Variable                                         | No fall | 1–2 falls | >2 falls | No fall vs. ≥1 fall |          | ≤2 falls vs. >2 falls |          |
|-------|--------------------------------------------------|---------|-----------|----------|---------------------|----------|-----------------------|----------|
|       |                                                  |         |           |          | OR                  | 95% CI   | OR                    | 95% CI   |
| G1    | Walking in room                                  |         |           |          |                     |          |                       |          |
|       | Independent (reference)                          | 142     | 81        | 72       |                     |          |                       |          |
|       | Supervision or assistance                        | 21      | 28        | 24       | 2.3§                | 1.3, 4.0 | 1.5                   | 0.9, 2.6 |
|       | Total dependence or did not occur                | 61      | 25        | 18       | 0.7                 | 0.4, 1.0 | 0.6                   | 0.4, 1.1 |
| G1    | Locomotion on unit                               |         |           |          |                     |          |                       |          |
|       | Independent (reference)                          | 85      | 37        | 30       |                     |          |                       |          |
|       | Supervision or assistance                        | 44      | 37        | 34       | 2.0§                | 1.2, 3.4 | 1.7                   | 1.0, 3.0 |
|       | Total dependence or did not occur                | 95      | 60        | 50       | 1.5                 | 1.0, 2.2 | 1.3                   | 0.8, 2.2 |
| G1    | Dressing‡                                        |         |           |          |                     |          |                       |          |
|       | Independent (reference)                          | 78      | 33        | 22       |                     |          |                       |          |
|       | Supervision or assistance                        | 75      | 60        | 62       | 2.3§                | 1.5, 3.6 | 2.3§                  | 1.3, 4.0 |
|       | Total dependence or did not occur                | 71      | 41        | 30       | 1.4                 | 0.9, 2.3 | 1.4                   | 0.7, 2.5 |
| G1    | Toilet use                                       |         |           |          |                     |          |                       |          |
|       | Independent (reference)                          | 100     | 47        | 36       |                     |          |                       |          |
|       | Supervision or assistance                        | 48      | 42        | 43       | 2.1§                | 1.3, 3.4 | 2.0§                  | 1.2, 3.3 |
|       | Total dependence or did not occur                | 76      | 45        | 35       | 1.3                 | 0.8, 1.9 | 1.2                   | 0.7, 2.0 |
|       | Test for balance                                 |         |           |          |                     |          |                       |          |
| G3    | Standing position‡                               |         |           |          |                     |          |                       |          |
|       | Maintained position (reference)                  | 96      | 47        | 35       |                     |          |                       |          |
|       | Unsteady/partial physical support                | 56      | 52        | 59       | 2.3§                | 1.5, 3.6 | 2.2§                  | 1.4, 3.6 |
|       | Not able without physical support                | 72      | 35        | 20       | 0.9                 | 0.6, 1.4 | 0.8                   | 0.4, 1.4 |
|       | Walking aids                                     |         |           |          |                     |          |                       |          |
| G5    | Modes of locomotion                              |         |           |          |                     |          |                       |          |
|       | Nothing appropriate (reference)                  | 81      | 41        | 38       |                     |          |                       |          |
|       | Cane and/or wheeled self and/or wheelchair       | 142     | 93        | 74       | 1.2                 | 0.8, 1.8 | 1.0                   | 0.6, 1.6 |
|       | <i>Continence in last 14 days</i>                |         |           |          |                     |          |                       |          |
| H2    | Bladder continence‡                              |         |           |          |                     |          |                       |          |
|       | Continent (reference)                            | 109     | 41        | 28       |                     |          |                       |          |
|       | Incontinent                                      | 115     | 93        | 86       | 2.5§                | 1.7, 3.6 | 2.2§                  | 1.4, 3.6 |
|       | <i>Disease diagnoses</i>                         |         |           |          |                     |          |                       |          |
| I     | Cerebrovascular diseases (ICD-10† codes I60–I69) |         |           |          |                     |          |                       |          |
|       | No (reference)                                   | 180     | 111       | 98       |                     |          |                       |          |
|       | Yes                                              | 45      | 23        | 16       | 0.7                 | 0.5, 1.2 | 0.7                   | 0.5, 1.2 |
| I     | Parkinson's disease (ICD-10 codes G20–G21)       |         |           |          |                     |          |                       |          |
|       | No (reference)                                   | 208     | 123       | 102      |                     |          |                       |          |
|       | Yes                                              | 17      | 11        | 12       | 1.3                 | 0.6, 2.4 | 1.4                   | 0.7, 2.8 |
|       | <i>Health conditions</i>                         |         |           |          |                     |          |                       |          |
|       | Problem conditions                               |         |           |          |                     |          |                       |          |
| J1    | Dizziness or vertigo‡                            |         |           |          |                     |          |                       |          |
|       | No (reference)                                   | 183     | 107       | 73       |                     |          |                       |          |
|       | Yes                                              | 41      | 27        | 41       | 1.7§                | 1.1, 2.6 | 2.4§                  | 1.5, 3.8 |

Table continues

trable by nursing staff, and focus on potentially amenable items to encourage implementation and application.

Our main interest was not primarily to identify new indicators but to improve the process of identifying persons at risk. Moreover, we hypothesized that the risk of falling could

TABLE 1. Continued

| Part*                             | Variable                                                  | No fall | 1–2 falls | >2 falls | No fall vs. ≥1 fall |          | ≤2 falls vs. >2 falls |          |
|-----------------------------------|-----------------------------------------------------------|---------|-----------|----------|---------------------|----------|-----------------------|----------|
|                                   |                                                           |         |           |          | OR                  | 95% CI   | OR                    | 95% CI   |
| Pain symptoms                     |                                                           |         |           |          |                     |          |                       |          |
| J2                                | Frequency                                                 |         |           |          |                     |          |                       |          |
|                                   | No pain (reference)                                       | 123     | 76        | 59       |                     |          |                       |          |
|                                   | Less than daily/daily                                     | 100     | 57        | 54       | 1.0                 | 0.7, 1.5 | 1.2                   | 0.8, 1.8 |
| Accidents                         |                                                           |         |           |          |                     |          |                       |          |
| J4                                | Fall‡                                                     |         |           |          |                     |          |                       |          |
|                                   | No fall (reference)                                       | 201     | 99        | 55       |                     |          |                       |          |
|                                   | Fall in last 180 days                                     | 23      | 35        | 59       | 5.3§                | 3.2, 8.8 | 5.5§                  | 3.5, 8.8 |
| J4                                | Fracture                                                  |         |           |          |                     |          |                       |          |
|                                   | No (reference)                                            | 215     | 124       | 107      |                     |          |                       |          |
|                                   | Yes                                                       | 9       | 10        | 7        | 1.8                 | 0.8, 4.0 | 1.2                   | 0.5, 2.9 |
| Medications                       |                                                           |         |           |          |                     |          |                       |          |
| O1                                | No. of medications                                        |         |           |          |                     |          |                       |          |
|                                   | 0–4 (reference)                                           | 142     | 83        | 63       |                     |          |                       |          |
|                                   | ≥5                                                        | 82      | 51        | 51       | 1.2                 | 0.8, 1.8 | 1.4                   | 0.9, 2.1 |
| O4                                | Antipsychotic‡                                            |         |           |          |                     |          |                       |          |
|                                   | No (reference)                                            | 164     | 78        | 70       |                     |          |                       |          |
|                                   | Yes                                                       | 60      | 56        | 44       | 1.8§                | 1.3, 2.7 | 1.3                   | 0.8, 2.0 |
| O4                                | Antianxiety                                               |         |           |          |                     |          |                       |          |
|                                   | No (reference)                                            | 217     | 129       | 110      |                     |          |                       |          |
|                                   | Yes                                                       | 7       | 5         | 4        | 1.2                 | 0.4, 3.2 | 1.0                   | 0.3, 3.3 |
| O4                                | Antidepressant                                            |         |           |          |                     |          |                       |          |
|                                   | No (reference)                                            | 198     | 118       | 93       |                     |          |                       |          |
|                                   | Yes                                                       | 26      | 16        | 21       | 1.3                 | 0.7, 2.3 | 1.7                   | 1.0, 3.0 |
| O4                                | Hypnotic                                                  |         |           |          |                     |          |                       |          |
|                                   | No (reference)                                            | 199     | 121       | 97       |                     |          |                       |          |
|                                   | Yes                                                       | 25      | 13        | 17       | 1.1                 | 0.6, 1.9 | 1.5                   | 0.8, 2.7 |
| Special treatments and procedures |                                                           |         |           |          |                     |          |                       |          |
| Devices and restraints            |                                                           |         |           |          |                     |          |                       |          |
| P4                                | Bed rails                                                 |         |           |          |                     |          |                       |          |
|                                   | No (reference)                                            | 152     | 103       | 83       |                     |          |                       |          |
|                                   | Yes                                                       | 72      | 31        | 31       | 0.7                 | 0.5, 1.1 | 0.9                   | 0.6, 1.5 |
| P4                                | Restraint‡                                                |         |           |          |                     |          |                       |          |
|                                   | No (reference)                                            | 218     | 120       | 102      |                     |          |                       |          |
|                                   | Yes                                                       | 6       | 14        | 12       | 4.3§                | 1.7, 0.5 | 2.0                   | 0.9, 4.2 |
| Hospital stay                     |                                                           |         |           |          |                     |          |                       |          |
| P5                                | Hospital stay with an overnight stay in the last 90 days‡ |         |           |          |                     |          |                       |          |
|                                   | No (reference)                                            | 201     | 119       | 92       |                     |          |                       |          |
|                                   | Yes                                                       | 23      | 15        | 22       | 1.5                 | 0.9, 2.7 | 2.0§                  | 1.1, 3.6 |

\* Part of the coding system used in the Minimum Data Set of the Resident Assessment Instrument.

† OR, odds ratio; CI, confidence interval; ADL, activities of daily living; ICD-10, *International Classification of Diseases, Tenth Revision*.

‡ Risk indicators included in the multiple logistic regression analysis.

§ Important risk indicators.

increase with moderate impairments and disability levels but could decrease with very severe limitations in several domains. Therefore, we included polytomous risk indicators

whenever possible and sensible. Another aim of the study was to identify indicators for fallers in general and for frequent fallers in particular.

## MATERIALS AND METHODS

### Population and setting

Subjects included in this prospective observational study were aged 60 years or older ( $n = 472$ ) and were living in three long-term-care institutions in a city in southern Germany (Ulm) during the 12-month study period (October 1998–September 1999). The residents were members of a control group within a cluster-randomized fall prevention trial.

In this area of Germany, the proportion of the elderly population living in the community as well as in long-term care is very similar to that in the nation. At the time of the study, 15.6 percent of the city population was older than age 65 years and 3.9 percent was aged 80 years or older; 5 percent of the population aged 65 years or older lived in a long-term-care setting.

According to current legislation, access to long-term care is restricted to residents who need a minimum of 1.5 daily hours of assistance with activities of daily living and have an expected duration of such assistance of more than 6 months (18). This need is preassessed by state-employed nurses and long-term-care physicians. Hospice and posthospital rehabilitation candidates were not included in the analysis.

### Measurements

Fall risk indicators were assessed cross-sectionally by study staff. Used were definitions of fall risk indicators according to the operationalized terms in version 2.0 of the Minimum Data Set of the Resident Assessment Instrument (19). Risk indicators in this instrument are either dichotomous, polytomous, or continuous variables. This instrument formerly was not used in this setting and was translated from a version by Morris et al. (20).

Falls were defined as “unintentionally coming to rest on ground or lower level regardless of a loss of consciousness.” Multiple fallers were predefined as residents having three or more falls. We considered single and dual fallers as a different entity whose falls were more likely to be caused by time-dependent risk factors such as, for example, acute illness or use of new medications. The study nurse checked the completeness of the fall calendars. Each ward kept a calendar counting the number of falls. Each fall had to be documented on a separate case report form that included details on location, time, and injuries. Falls were counted for all residents regardless of their mobility status. Residents who moved to the facility during the study period were included in the analysis to avoid selection bias. Data were collected prospectively.

### Statistical analysis

All data were entered into a database and were controlled by a second independent person. For quantitative variables, the median, minimum, maximum, mean, and standard deviation were calculated. For categorical variables, absolute and relative frequencies were reported. For all potential risk indicators for falls, crude odds ratios with corresponding 95 percent confidence intervals were calculated. Odds ratios were deter-

mined for the risk of falling at least once (falls in general) and for the risk of falling three or more times (frequent falls). Crude odds ratios and their confidence intervals were used to preselect risk indicators. Additionally, Cramer’s  $V$  was calculated to assess interdependences between risk indicators. In case of highly related risk indicators (Cramer’s  $V > 0.5$ ), only one risk indicator was considered for the logistic regression analysis to avoid multicollinearity problems. Thereby, the variable with the highest clinical relevance was chosen. The resulting variables were then included in a multiple logistic regression analysis (21). To select important risk indicators, backward elimination (selection level, 5 percent) was used. Odds ratios, 95 percent confidence intervals, and  $p$  values are presented here. Interaction terms were not considered because of numerical problems and because the main aim was to develop an easily applicable screening tool. We did not intend to further improve the fit of the logistic regression model by adding interaction terms that would have been helpful and essential. Sensitivity, specificity, and positive and negative predictive values were calculated with corresponding 95 percent confidence intervals. Receiver operating characteristic curves were plotted to describe the sensitivity and specificity of the selected risk indicators. Additionally, the area under the curve was determined. Statistical analyses were conducted by using SAS statistical software, version 8.2 (SAS Institute, Inc., Cary, North Carolina).

### Consent and approval

All participants or their legal guardians had to give informed consent to participate in the study. The study was approved by the ethical committee of the University of Ulm.

## RESULTS

The mean age of participants was 84 years (standard deviation, 7.0; median, 85; minimum–maximum, 60–104), and most subjects were female (77 percent). The 1-year mortality rate was 17.4 percent. Total follow-up time for the 472 residents was 383 resident-years. A total of 331 (70 percent) participants were followed for 10–12 months, 50 participants (11 percent) for 7–9 months, 59 participants (13 percent) for 4–6 months, and 27 participants (6 percent) for up to 3 months. For five residents, the time of discharge was not recorded. Overall, 980 falls (2,558 falls per 1,000 resident-years) for 247 fallers (645 fallers per 1,000 resident-years) were recorded. The number of frequent fallers was 115 (300 fallers per 1,000 resident-years).

### Crude odds ratios

Crude odds ratios and 95 percent confidence intervals are shown in table 1. Of the 46 potential risk indicators considered, 21 seemed strongly associated with the risk of falling and/or the risk of experiencing multiple falls. All polytomous risk indicators were associated with a remarkably higher risk of falling related to moderate impairment versus very severe impairment. Some indicators were closely related to others. Therefore, to avoid multicollinearity problems in the logistic regression model, contingency coeffi-

**TABLE 2. Results of multiple logistic regression analysis of participants in long-term care (n = 472), Ulm, Germany, October 1998–September 1999**

|                                   | No fall vs. ≥1 fall |           |          | ≤2 falls vs. >2 falls |          |          |
|-----------------------------------|---------------------|-----------|----------|-----------------------|----------|----------|
|                                   | OR*                 | 95% CI†   | p value  | OR*                   | 95% CI   | p value  |
| <b>Transfer</b>                   |                     |           |          |                       |          |          |
| Independent (reference)           | 1.0                 |           | } <0.001 | 1.0                   |          | } 0.002  |
| Supervision or assistance         | 1.6                 | 0.9, 2.6  |          |                       |          |          |
| Total dependence or did not occur | 0.4                 | 0.2, 0.7  |          |                       |          |          |
| <b>Bladder continence</b>         |                     |           |          |                       |          |          |
| Continent (reference)             | 1.0                 |           | } 0.003  | 1.0                   |          | } 0.007  |
| Incontinent                       | 2.0                 | 1.3, 3.2  |          |                       |          |          |
| <b>Fall</b>                       |                     |           |          |                       |          |          |
| No fall (reference)               | 1.0                 |           | } <0.001 | 1.0                   |          | } <0.001 |
| Fall in last 180 days             | 4.9                 | 2.9, 8.4  |          |                       |          |          |
| <b>Short-term memory</b>          |                     |           |          |                       |          |          |
| Intact (reference)                | 1.0                 |           | } 0.045  |                       |          |          |
| Memory problem                    | 1.6                 | 1.1, 2.6  |          |                       |          |          |
| Not assessable                    | 0.9                 | 0.4, 2.0  |          |                       |          |          |
| <b>Trunk restraint</b>            |                     |           |          |                       |          |          |
| No (reference)                    | 1.0                 |           | } 0.004  |                       |          |          |
| Yes                               | 4.7                 | 1.6, 13.3 |          |                       |          |          |
| <b>Depression any symptom</b>     |                     |           |          |                       |          |          |
| Not exhibited (reference)         |                     |           |          | 1.0                   |          | } 0.049  |
| At least one exhibited            |                     |           |          | 1.6                   | 1.0, 2.6 |          |

\* Odds ratios (OR) were adjusted for other variables in the model.

† CI, confidence interval.

cients were calculated. Of those risk indicators showing a strong interdependence, only one was included in the logistic regression analysis (short-term memory instead of temporal orientation, transfer instead of walking in the room or locomotion on unit, dressing instead of toilet use). All items concerning depressive symptoms and disruptive behavioral patterns were summarized in two group indicators. Thus, 13 risk indicators (identified in table 1) were preselected for the multiple logistic regression analysis.

### Multiple logistic regression analysis

Variable selection with backward elimination in the two binary multiple logistic regression models revealed the results presented in table 2. Important risk indicators for predicting falling at least once (model 1) were short-term memory loss, transfer assistance, urinary incontinence, positive fall history, and use of trunk restraints. To discriminate frequent fallers from residents experiencing at most two falls (model 2), the pool of important risk indicators selected was slightly different and consisted of the following variables: depressive symptoms, transfer assistance, urinary incontinence, and positive fall history.

Receiver operating characteristic curves are shown in figure 1. The area under the curves was calculated as 0.756 for model 1 and 0.755 for model 2. Where the sum of sensi-

tivity and specificity is maximal in the two curves, sensitivity and specificity were 78.2 percent (95 percent confidence interval (CI): 72.6 percent, 83.2 percent) and 60.3 percent (95 percent CI: 53.5 percent, 66.7 percent), respectively, in model 1 and 69.3 percent (95 percent CI: 60.0 percent, 77.6 percent) and 70.4 percent (95 percent CI: 65.4 percent, 75.1 percent), respectively, in model 2. The positive predictive value for falling in general (model 1) was 68.6 percent (95 percent CI: 62.3 percent, 73.9 percent). The negative predictive value was 71.4 percent (95 percent CI: 64.4 percent, 77.8 percent). For the frequent-faller group, the positive predictive value was 42.7 percent (95 percent CI: 35.5 percent, 50.1 percent) and the negative predictive value was 87.8 percent (95 percent CI: 83.5 percent, 91.4 percent). Residents without any of the indicators selected in model 1 had a probability of falling of 29 percent (95 percent CI: 22 percent, 38 percent). However, identifying residents at high risk of falling according to the presence of at least one risk indicator from model 1 led to a sensitivity of 92 percent (95 percent CI: 87 percent, 95 percent).

### DISCUSSION

The cohort of long-term-care residents we examined had the expected high prevalence of cognitive dysfunction, depressive symptoms, and physical limitations. The inci-

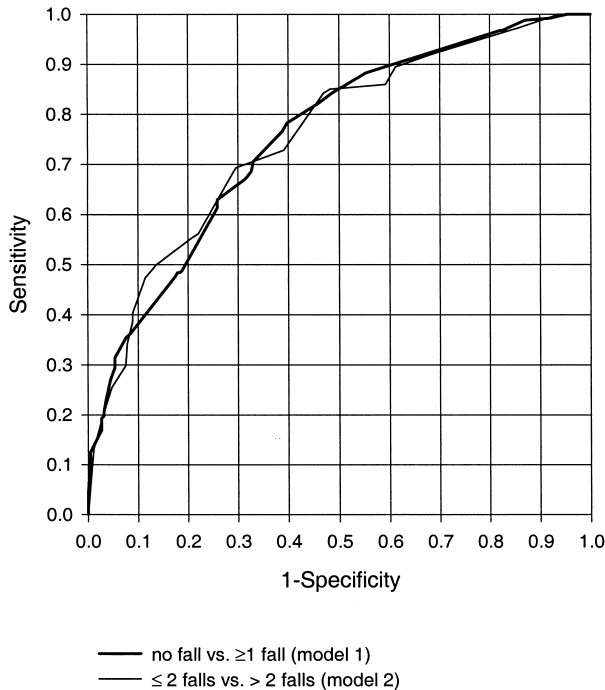

**FIGURE 1.** Receiver operating characteristic curve for predicting falls according to the risk indicators of transfer, bladder incontinence, fall, short-term memory, trunk restraint, and any depression symptom among urban long-term-care residents in Ulm, Germany ( $n = 472$ ), October 1998–September 1999.

dence of falls was within the reported range of most epidemiologic studies that included long-term-care residents. Age, sex, and mortality were representative for a nursing-home population.

In a multiple logistic regression analysis, short-term memory loss, transfer assistance, urinary incontinence, positive fall history in the past 6 months, and use of trunk restraints were selected as important risk indicators for falls. Depressive symptoms, transfer assistance, urinary incontinence, and positive fall history were selected when frequent falls were considered. The described predisposing indicators had considerable sensitivity and specificity to discriminate between frequent fallers, single fallers, and nonfallers in long-term care. Positive and negative prediction was moderate.

Most research groups have used more sophisticated and multidisciplinary procedures applied by interdisciplinary teams to assess the risk of falling (14). Doing so would not have been applicable in our sample, since only 30 percent of the residents had access to regular physiotherapy, and most physicians were routinely available only biweekly. Therefore, we chose an instrument that could be applied by nursing staff with a modest training effort, was simple to administer, and required less than 15 minutes to fill in the forms. Screening could be conducted by nursing staff given minimal training. Acceptance by staff was high because only

information that had to be obtained for care planning purposes was processed.

In contrast to some other studies on fall prevention in long-term-care settings, we entered polytomous risk indicators into our model because we hypothesized that severe physical limitations could lead to a decrease in mobility and thus a reduction in the risk of falling. For items such as transfer, we observed that moderately dependent residents had a higher incidence of falls than residents needing no help or those who were severely dependent. This relation would not have been discovered if assessment instruments had consisted of only dichotomous risk indicators.

Given the small numbers of successful intervention studies in long-term-care settings, it was encouraging to find that several risk indicators are potentially modifiable but have not been routinely addressed in previous intervention trials. Urinary incontinence is a treatable condition but has only recently been mentioned as an intervention target for fall prevention. Nocturia and urge incontinence seem to be the major problems in this context (22). Behavioral disorders, misuse of restraints, wandering, motor agitation, and inappropriate psychoactive medication have been addressed in several studies, with promising results (17, 22). The fall risk associated with depression and antidepressant medication remains a matter of debate (23). The incidence of falls has not been documented adequately in drug intervention trials. Therefore, it remains unsettled whether use of antidepressants causes falls or whether the increased physical activity associated with an improvement in depressive symptoms increases the probability of falls per meters walked. More than 50 percent of the falls in long-term care are transfer related. If vertical movements such as standing up from a chair or bed yield a higher risk than horizontal movements for long-term-care residents, the content of exercise programs should be questioned, which possibly should be more task specific. Medical treatment of cognitive impairment might reduce fall rates by improving attention and orientation, but this issue has not been studied adequately up to now. Controlled trials on restraints are lacking. Previous observational studies on physical restraints and bed side rails did not demonstrate a protective effect against falls. Conversely, removal of restraints has not been associated with a reduction in fall rates even though it is desirable for other reasons (4).

We are aware that our model has limitations and certainly can be improved. Time-dependent factors (precipitating factors) such as overdemanding activities, acute illness, or new medications were not documented adequately for the time period when the fall occurred. Social factors such as staff time per resident, staff motivation, and administrative processes were also not included in this study. Environmental factors such as footwear, lighting conditions, and inadequate bed height at the time of the accident were insufficiently documented. Since the participants were members of a control group of an intervention trial, we cannot rule out the possibility that this factor influenced staff and resident behavior during the study period. In addition, information bias has to be considered, especially because demented residents are difficult to assess. This limitation might have led to an underestimation of, for example, vision problems or



depressive symptoms in this group. Selection bias is less likely, since admittance is open to all segments of the population because of a standardized reimbursement scheme secured by a mandated long-term-care insurance system.

The generalizability of our results remains to be demonstrated since access, finances, and the role of long-term care are different in health care systems. It is possible that risk indicator profiles will change when successful intervention strategies are implemented and eliminate or compensate for risk factors. Fall risk identification should be a dynamic process. Moreover, we would not recommend using cutoff scores. The presence of any of the risk indicators in the multiple logistic regression model is already indicative of high risk. Consideration of increasing the sensitivity of the screening process must include the capacity of the long-term-care system to handle a higher number of false positives. Therefore, it must be stressed that not all fall preventive measures are free of side effects. Measures might include advice to avoid certain activities or lead to an additional burden such as wearing a hip protector that increases the risk of incontinence and/or dressing difficulties (16).

In conclusion, the observational design of the study did not prove the causal role of the risk indicators. Properly designed intervention trials must be conducted to demonstrate the effects of removing or compensating for the identified risk indicators on fall rates.

## ACKNOWLEDGMENTS

This study was supported by the Federal Ministry of Health (Va4-43164-1/403), State Ministry of Social Affairs (Baden-Württemberg, 44-5276-79), Kässbohrer Foundation, University of Ulm (project 555), City Council of Ulm, and Bethesda Geriatriische Klinik.

The authors thank Barbara Eichner, Huelja Can, Barbara Walter-Jung, Marion Hausner, Renate Platzer, and Evelyne Schneider for secretarial work and data management.

## REFERENCES

- Gillespie LD, Gillespie WJ, Robertson MC, et al. Interventions for preventing falls in elderly persons. *Cochrane Database Syst Rev* 2001;CD000340.
- Nevitt MC, Cummings SR, Kidd S, et al. Risk factors for recurrent nonsyncopal falls. A prospective study. *JAMA* 1989;261:2663–8.
- Campbell AJ, Borrie MJ, Spears GF. Risk factors for falls in a community-based prospective study of people 70 years and older. *J Gerontol* 1989;44:M112–M117.
- Lord SR, Ward JA, Williams P, et al. An epidemiological study of falls in older community-dwelling women: the Randwick falls and fractures study. *Aust J Public Health* 1993;17:240–5.
- Graafmans WC, Ooms ME, Hofstee HMA, et al. Falls in the elderly: a prospective study of risk factors and risk profiles. *Am J Epidemiol* 1996;143:1129–36.
- Tromp A, Pluijm S, Smit J, et al. Fall-risk screening test: a prospective study on predictors for falls in community-dwelling elderly. *J Clin Epidemiol* 2001;54:837–44.
- Dolinis J, Harrison JE, Andrews GR. Factors associated with falling in older Adelaide residents. *Aust J Public Health* 1997;21:462–8.
- Capezuti E, Strumpf NE, Evans LK, et al. The relationship between physical restraint removal and falls and injuries among nursing home residents. *J Gerontol A Biol Sci Med Sci* 1998;53:M47–52.
- Luukinen H, Koski K, Laippal P, et al. Risk factors for recurrent falls in the elderly in long-term institutional care. *Public Health* 1995;109:57–65.
- Myers AH, Baker SP, Van Natta ML, et al. Risk factors associated with falls and injuries among elderly institutionalized persons. *Am J Epidemiol* 1991;133:1179–90.
- Thapa PB, Brockman KG, Gideon P, et al. Injurious falls in nonambulatory nursing home residents: a comparative study of circumstances, incidence, and risk factors. *J Am Geriatr Soc* 1996;44:273–8.
- Rubenstein LZ, Josephson KR, Osterweil D. Falls and fall prevention in the nursing home. *Clin Geriatr Med* 1996;12:881–902.
- Kiely DK, Kiel DP, Burrows AB, et al. Identifying nursing home residents at risk for falling. *J Am Geriatr Soc* 1998;46:551–6.
- Lundin-Olsson L, Nyberg L, Gustafson Y. The Mobility Interaction Fall chart. *Physiother Res Int* 2000;5:190–201.
- Ray WA, Taylor JA, Meador KG, et al. A randomized trial of a consultation service to reduce falls in nursing homes. *JAMA* 1997;278:557–62.
- Becker C, Kron M, Lindemann U, et al. Effectiveness of a multifaceted intervention on falls in nursing home residents. *J Am Geriatr Soc* 2003;51:306–13.
- Jensen J, Lundin-Olsson L, Nyberg L, et al. Fall and injury prevention in older people living in residential care facilities. A cluster randomized trial. *Ann Intern Med* 2002;136:733–41.
- Becker C, Leistner K, Nikolaus T. Introducing a statutory insurance system for long-term care (Pflegeversicherung) in Germany. In: Michel JP, Rubenstein LZ, Vellas BJ, et al, eds. *Geriatric programs and departments around the world*. New York, NY: Springer Publishing, 1998:55–64.
- Hawes C, Morris JN, Phillips CD, et al. Development of the nursing home Resident Assessment Instrument in the USA. *Age Ageing* 1997;26:19–25.
- Morris JN, Murphy K, Nonemaker S. *Long-Term Care Resident Assessment Instrument. User's manual, version 2.0*. Chapel Hill, NC: InterRAI Columbia, 1995.
- Hosmer H, Lemeshow D. *Applied logistic regression*. New York, NY: John Wiley & Sons, 2000.
- Brown JS, Vittinghoff E, Wymann JF, et al. Urinary incontinence: does it really increase risk for falls and fractures? Study of osteoporotic fracture group. *J Am Geriatr Soc* 2000;48:721–5.
- Avorn J. Depression in the elderly—falls and pitfalls. *N Engl J Med* 1998;339:918–20.
